# Supplementary material
Source: Elsevier journal article supplement (https://www.sciencedirect.com/science/article/pii/S0021755722000961)
Supplement: mmc1 [file S0021755722000961:mmc1.docx]

JPED-D-22-00167 – Supplementary Material

**Supplementary Table 1 - Food consumption** **of children of 7 to 10 years of age, classified according to the nutritional status in normal weight, overweight and obesity.**

| **Food consumption** | **Nutritional status** | | | | | | |
| --- | --- | --- | --- | --- | --- | --- | --- |
| **Normal weight**  **(n = 101)** | | **Overweight**  **(n = 33)** | | **Obesity**  **(n = 26)** | |  |
| **n** | **%** | **n** | **%** | **n** | **%** | **p** |
| **Meals while watch TV, on computer and/or on cellphone** |  |  |  |  |  |  |  |
| Yes | 65 | 64.4 | 24 | 75.0 | 19 | 70.4 | 0.502 |
| No | 36 | 35.6 | 8 | 25.0 | 8 | 29.6 |
| **Amount of meals throughout the day** |  |  |  |  |  |  |  |
| 1-3 | 6 | 5.9 | 0 | 0.0 | 2 | 7.4 | 0.333 |
| 4-6 | 95 | 94.1 | 32 | 100.0 | 25 | 92.3 |
| **Beans** |  |  |  |  |  |  |  |
| Yes | 73 | 72.3 | 20 | 62.2 | 16 | 59.3 | 0.325 |
| No | 28 | 27.7 | 12 | 37.5 | 11 | 40.7 |
| **Fresh fruit** |  |  |  |  |  |  |  |
| Yes | 50 | 49.5 | 18 | 56.2 | 17 | 63.0 | 0.426 |
| No | 51 | 50.5 | 14 | 43.8 | 10 | 37.0 |
| **Greens and/or vegetables** |  |  |  |  |  |  |  |
| Yes | 43 | 42.6 | 17 | 53.1 | 12 | 44.4 | 0.578 |
| No | 58 | 57.4 | 15 | 46.9 | 15 | 55.6 |
| **Hamburger and/or sausage** |  |  |  |  |  |  |  |
| Yes | 50 | 49.5 | 16 | 50.0 | 13 | 48.1 | 0.989 |
| No | 51 | 50.5 | 16 | 50.0 | 14 | 51.9 |
| **Sweetened beverages** |  |  |  |  |  |  |  |
| Yes | 78 | 77.2 | 27 | 84.4 | 18 | 66.7 | 0.272 |
| No | 23 | 22.8 | 5 | 15.6 | 9 | 33.3 |
| **Instant noodles, packet chips or salty crackers** |  |  |  |  |  |  |  |
| Yes | 68 | 67.3 | 21 | 65.6 | 18 | 66.7 | 0.984 |
| No | 33 | 32.7 | 11 | 34.4 | 9 | 33.3 |
| **Stuffed biscuit and candies** |  |  |  |  |  |  |  |
| Yes | 69 | 68.3 | 20 | 62.5 | 22 | 81.5 | 0.704 |
| No | 32 | 31.7 | 12 | 37.5 | 5 | 18.5 |

Pearson's Chi-Square Test. p ≤ 0.05.
